# Supplementary material for: Impact of phospholipase C β1 in glioblastoma: a study on the main mechanisms of tumor aggressiveness
Source: Springer Nature journal article supplement (doi:10.1007/s00018-022-04198-1), 2022-03-18
Supplement: MOESM1 [file 18_2022_4198_MOESM1_ESM.pdf]

## **Supplementary Information:**

**Article Title:** Impact of Phospholipase C  $\beta$ 1 in Glioblastoma: a study on the main mechanisms of tumor aggressiveness

**Journal Name:** Cellular and Molecular Life Sciences (CMLS)

**Authors:** Stefano Ratti, Maria Vittoria Marvi, Sara Mongiorgi, Eric Owusu Obeng, Isabella Rusciano, Giulia Ramazzotti, Luca Morandi, Sofia Asioli, Matteo Zoli, Diego Mazzatenta, Pann-Ghill Suh, Lucia Manzoli, Lucio Cocco.

### **Corresponding author:**

**Lucio Cocco:** [lucio.cocco@unibo.it](mailto:lucio.cocco@unibo.it)

Cellular Signalling Laboratory, Department of Biomedical and Neuromotor Sciences (DIBINEM), University of Bologna, Bologna 40126, Italy.

## Supplementary Tables:

|            | MGMT  | IDH1                                 | IDH2 | H3F3A | H3C2 | H3C3              | TERT                      | date of birth | age at diagnosis | Gender |
|------------|-------|--------------------------------------|------|-------|------|-------------------|---------------------------|---------------|------------------|--------|
| Patient 1  | UNMET | WT                                   | WT   | WT    | WT   | WT                | g.1,295,113 G>A (VAF:39%) | 01/02/25      | 68               | M      |
| Patient 2  | UNMET | WT                                   | WT   | WT    | WT   | WT                | g.1,295,113 G>A (VAF:26%) | 08/09/35      | 57               | M      |
| Patient 3  | MET   | WT                                   | WT   | WT    | WT   | WT                | g.1,295,113 G>A (VAF:42%) | 23/01/29      | 69               | M      |
| Patient 4  | MET   | WT                                   | WT   | WT    | WT   | WT                | g.1,295,113 G>A (VAF:42%) | 29/05/23      | 69               | F      |
| Patient 5  | MET   | WT                                   | WT   | WT    | WT   | WT                | WT                        | 20/10/28      | 63               | F      |
| Patient 6  | MET   | WT                                   | WT   | WT    | WT   | WT                | g.1,295,113 G>A (VAF:36%) | 30/09/20      | 73               | M      |
| Patient 7  | MET   | WT                                   | WT   | WT    | WT   | WT                | g.1,295,113 G>A (VAF:51%) | 01/04/32      | 62               | F      |
| Patient 8  | UNMET | WT                                   | WT   | WT    | WT   | WT                | WT                        | 27/10/45      | 54               | M      |
| Patient 9  | MET   | WT                                   | WT   | WT    | WT   | WT                | g.1,295,113 G>A (VAF:44%) | 22/03/34      | 66               | M      |
| Patient 10 | UNMET | WT                                   | WT   | WT    | WT   | WT                | WT                        | 07/12/40      | 75               | M      |
| Patient 11 | MET   | p.R132H (VAF:44%)                    | WT   | WT    | WT   | WT                | WT                        | 15/01/42      | 51               | M      |
| Patient 12 | MET   | p.R132H (VAF:30%)                    | WT   | WT    | WT   | WT                | WT                        | 03/02/62      | 36               | M      |
| Patient 13 | MET   | p.R132H (VAF:34%)                    | WT   | WT    | WT   | WT                | WT                        | 25/12/31      | 65               | M      |
| Patient 14 | MET   | WT                                   | WT   | WT    | WT   | WT                | g.1,295,113 G>A (VAF:43%) | 25/05/33      | 60               | M      |
| Patient 15 | NA    | WT                                   | WT   | WT    | WT   | WT                | g.1,295,113 G>A (VAF:59%) | 08/02/35      | 63               | F      |
| Patient 16 | MET   | p.R132H (VAF:43%)                    | WT   | WT    | WT   | WT                | WT                        | 25/12/31      | 65               | M      |
| Patient 17 | UNMET | WT                                   | WT   | WT    | WT   | WT                | g.1,295,113 G>A (VAF:48%) | 24/06/57      | 45               | M      |
| Patient 18 | UNMET | WT                                   | WT   | WT    | WT   | p. T33T (VAF:50%) | g.1,295,113 G>A (VAF:42%) | 27/06/31      | 72               | F      |
| Patient 19 | MET   | WT                                   | WT   | WT    | WT   | WT                | g.1,295,113 G>A (VAF:55%) | 28/05/29      | 68               | F      |
| Patient 20 | NA    | WT                                   | WT   | WT    | WT   | WT                | g.1,295,113 G>A (VAF:47%) | 02/03/47      | 56               | M      |
| Patient 21 | MET   | WT                                   | WT   | WT    | WT   | WT                | g.1,295,135 G>A (VAF:41%) | 02/06/37      | 66               | M      |
| Patient 22 | UNMET | WT                                   | WT   | WT    | WT   | WT                | g.1,295,113 G>A (VAF:38%) | 23/06/32      | 70               | M      |
| Patient 23 | UNMET | WT                                   | WT   | WT    | WT   | WT                | g.1,295,135 G>A (VAF:64%) | 07/02/61      | 41               | M      |
| Patient 24 | UNMET | WT                                   | WT   | WT    | WT   | WT                | g.1,295,113 G>A (VAF:37%) | 08/09/32      | 70               | M      |
| Patient 25 | UNMET | WT                                   | WT   | WT    | WT   | p. T33T (VAF:48%) | g.1,295,113 G>A (VAF:37%) | 16/04/68      | 35               | M      |
| Patient 26 | UNMET | p.R132H (VAF:11%) - p.W124* (VAF:5%) | WT   | WT    | WT   | WT                | g.1,295,113 G>A (VAF:55%) | 12/08/44      | 58               | M      |
| Patient 27 | UNMET | WT                                   | WT   | WT    | WT   | WT                | g.1,295,113 G>A (VAF:47%) | 05/10/33      | 69               | M      |
| Patient 28 | UNMET | NA                                   | WT   | NA    | WT   | p. T33T (VAF 50%) | g.1,295,113 G>A (VAF:54%) | 30/06/43      | 59               | M      |
| Patient 29 | UNMET | WT                                   | WT   | WT    | WT   | WT                | g.1,295,113 G>A (VAF:24%) | 03/05/44      | 58               | M      |
| Patient 30 | MET   | WT                                   | WT   | WT    | WT   | WT                | g.1,295,113 G>A (VAF:47%) | 06/04/35      | 67               | F      |
| Patient 31 | UNMET | WT                                   | WT   | WT    | WT   | WT                | g.1,295,113 G>A (VAF:5%)  | 12/01/36      | 66               | F      |
| Patient 32 | MET   | WT                                   | WT   | NA    | WT   | WT                | g.1,295,113 G>A (VAF:45%) | 18/02/36      | 62               | M      |
| Patient 33 | UNMET | WT                                   | WT   | WT    | WT   | WT                | g.1,295,113 G>A (VAF:52%) | 20/07/31      | 65               | F      |
| Patient 34 | UNMET | WT                                   | WT   | WT    | WT   | WT                | g.1,295,113 G>A (VAF:33%) | 19/05/26      | 71               | F      |
| Patient 35 | MET   | WT                                   | WT   | WT    | WT   | WT                | g.1,295,113 G>A (VAF:52%) | 02/04/31      | 66               | F      |
| Patient 36 | MET   | p.R132H (VAF:36%)                    | WT   | NA    | WT   | WT                | WT                        | 25/12/31      | 65               | M      |
| Patient 37 | UNMET | WT                                   | WT   | WT    | WT   | p. T33T (55%)     | g.1,295,113 G>A (VAF:31%) | 25/05/45      | 52               | M      |
| Patient 38 | UNMET | WT                                   | WT   | WT    | WT   | WT                | g.1,295,135 G>A (VAF:18%) | 19/12/29      | 66               | M      |
| Patient 39 | MET   | WT                                   | WT   | WT    | WT   | WT                | g.1,295,113 G>A (VAF:41%) | 18/02/36      | 60               | M      |
| Patient 40 | MET   | WT                                   | WT   | WT    | WT   | WT                | g.1,295,113 G>A (VAF:44%) | 12/04/25      | 68               | M      |
| Patient 41 | MET   | NA                                   | NA   | NA    | NA   | NA                | NA                        | 22/10/56      | 44               | F      |
| Patient 42 | NA    | NA                                   | NA   | NA    | NA   | NA                | NA                        | 15/02/53      | 46               | F      |
| Patient 43 | UNMET | NA                                   | NA   | NA    | NA   | NA                | NA                        | 29/03/31      | 69               | M      |
| Patient 44 | NA    | NA                                   | NA   | NA    | NA   | NA                | NA                        | 30/08/34      | 67               | M      |
| Patient 45 | MET   | NA                                   | NA   | NA    | NA   | NA                | NA                        | 14/09/27      | 72               | M      |
| Patient 46 | NA    | NA                                   | NA   | NA    | NA   | NA                | NA                        | 25/02/33      | 70               | M      |
| Patient 47 | MET   | NA                                   | NA   | NA    | NA   | NA                | NA                        | 23/07/51      | 50               | M      |
| Patient 48 | MET   | NA                                   | NA   | NA    | NA   | NA                | NA                        | 27/06/43      | 57               | F      |
| Patient 49 | UNMET | NA                                   | NA   | NA    | NA   | NA                | NA                        | 13/10/46      | 54               | F      |
| Patient 50 | NA    | NA                                   | NA   | NA    | NA   | NA                | NA                        | 28/02/32      | 67               | F      |

### Supplementary Table 1: Data and Molecular characterization of samples from 50 Glioblastoma patients

Among the 50 glioblastoma samples, only six were detected mutant for isocitrate dehydrogenase 1 (*IDH1*), *p.R132H* and none for isocitrate dehydrogenase 2 (*IDH2*) and histone *H3-3A*. These *IDH1*-mutated samples will be classified as Adult-type diffuse astrocytoma, *IDH* mutant, grade 4 considering the recent tumor classification update(1). The Telomerase Reverse Transcriptase (*TERT*) promoter was found to be mutated in 32 cases (29 for g.1,295,113 G>A and 3 for g.1,295,135 G>A). O-6-Methylguanine-DNA Methyltransferase (*MGMT*) was detected hypermethylated in 23 cases.

## Supplementary Figures:

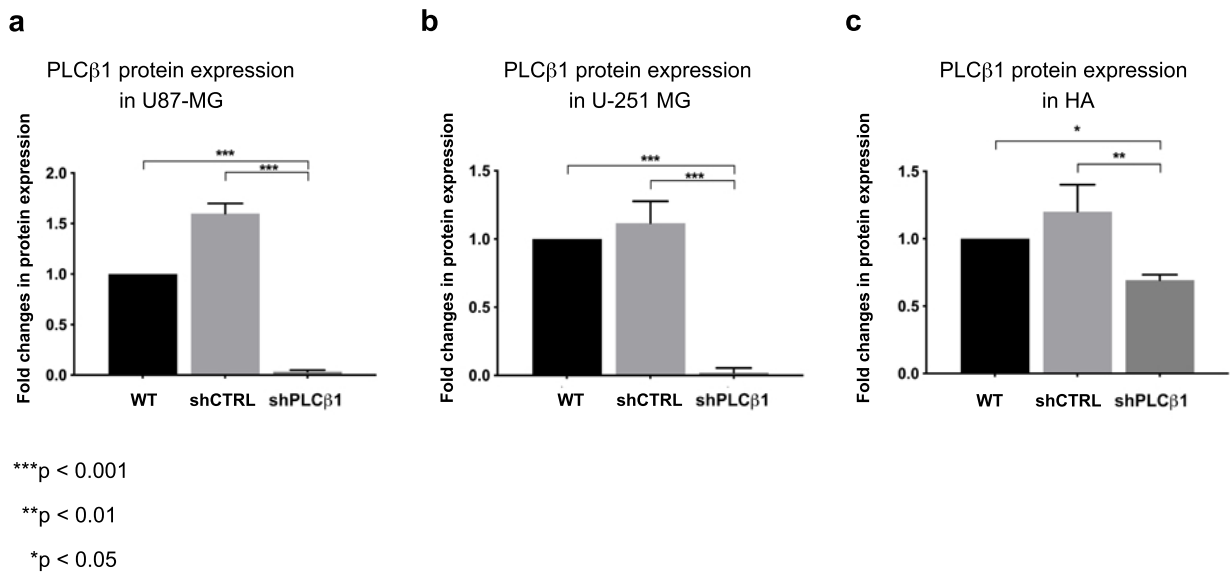

### Supplementary Fig. 1: Quantitative analysis of PLCβ1 protein expression

**Panels a, b and c:** Quantitative analysis of PLCβ1 protein expression in U87-MG (**a**), U-251 MG (**b**) and HA (**c**). PLCβ1-silenced cells (shPLCβ1) were compared to wild type (WT) and mock-transduced (shCTRL) cells. WT cells were used as reference samples. Columns show the mean ± SD of three independent experiments with \*p < 0.05, \*\*p < 0.01 and \*\*\*p < 0.001.

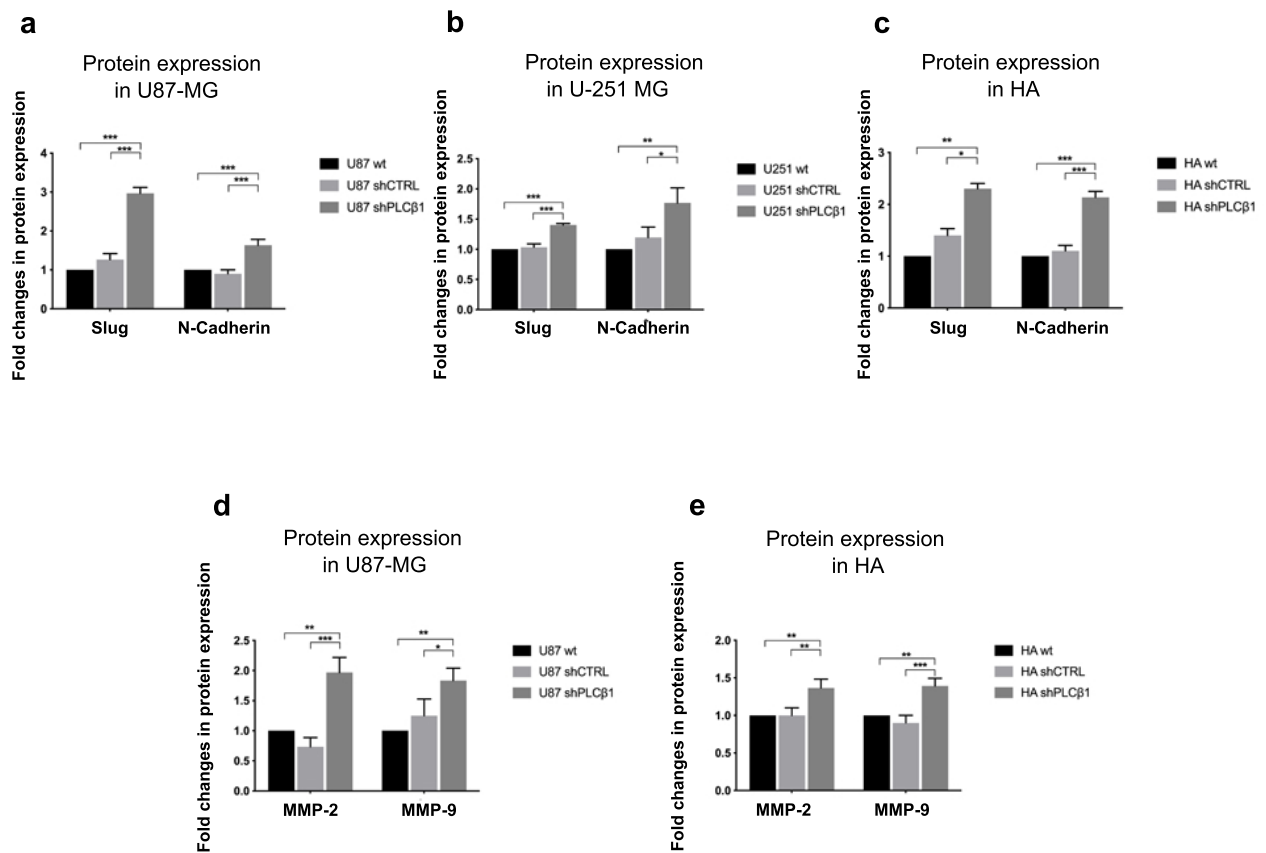

\*\*\*p < 0.001

\*\*p < 0.01

\*p < 0.05

### Supplementary Fig. 2: Quantitative analysis of Mesenchymal markers and MMPs protein expression

**Panels a, b and c:** Quantitative analysis of Slug and N-Cadherin protein expression in U87-MG (**a**), U-251 MG (**b**) and HA (**c**). PLCβ1-silenced cells (shPLCβ1) were compared to wild type (WT) and mock-transduced (shCTRL) cells. WT cells were used as reference samples. Columns show the mean ± SD of three independent experiments with \*p < 0.05, \*\*p < 0.01 and \*\*\*p < 0.001. **Panels d and e:** Quantitative analysis of MMP-2 and MMP-9 protein expression in U87-MG (**d**) and HA (**e**). PLCβ1-silenced cells (shPLCβ1) were compared to wild type (WT) and mock-transduced (shCTRL) cells. WT cells were used as reference samples. Columns show the mean ± SD of three independent experiments with \*p < 0.05, \*\*p < 0.01 and \*\*\*p < 0.001.

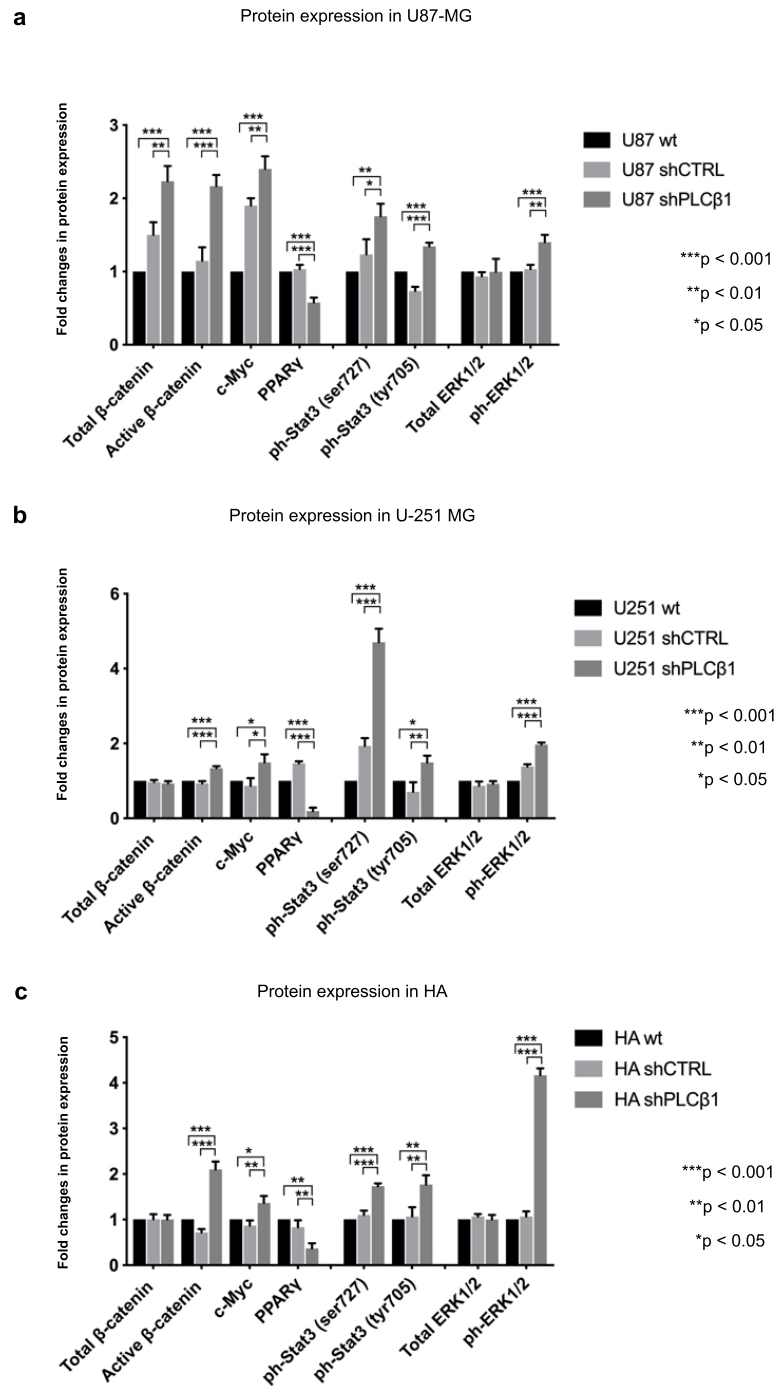

**Supplementary Fig. 3: Quantitative analysis of the protein expression of the molecules belonging to the main survival pathways**

**Panels a, b and c:** Quantitative analysis of the protein expression of the molecules belonging to the main survival pathways in U87-MG (**a**), U-251 MG (**b**) and HA (**c**). PLCβ1-silenced cells (shPLCβ1) were compared to wild type (WT) and mock-transduced (shCTRL) cells. WT cells were used as reference samples. Columns show the mean ± SD of three independent experiments with \* $p < 0.05$ , \*\* $p < 0.01$  and \*\*\* $p < 0.001$ .

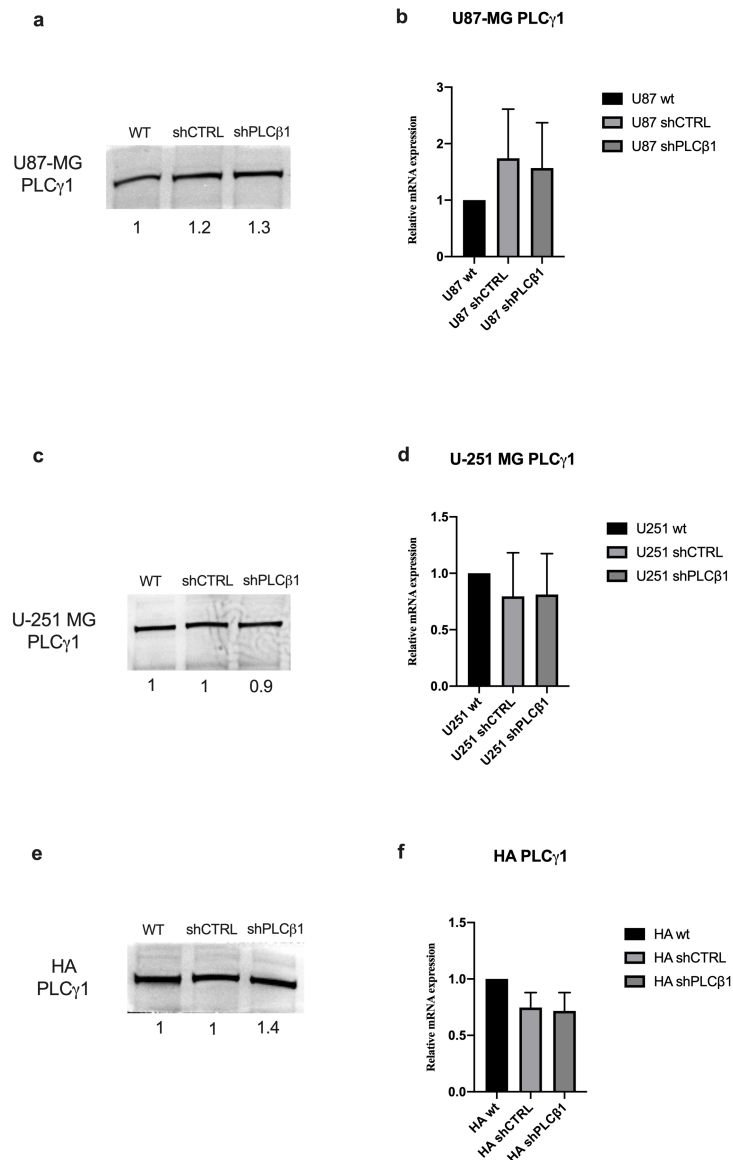

#### Supplementary Fig. 4: Consequences of PLC $\beta$ 1 modulation on PLC $\gamma$ 1 expression

**Panels a, c and e:** Western blot analysis of PLC $\gamma$ 1 expression after PLC $\beta$ 1 silencing on U87-MG (**a**), U-251 MG (**c**) and HA primary astrocytes (**e**). PLC $\beta$ 1-silenced cells (shPLC $\beta$ 1) were compared to wild type (WT) and mock-transduced (shCTRL) samples. Densitometric analysis was performed with total protein normalization through the iBright analysis software. **Panels b, d and f:** PLC $\gamma$ 1 mRNA expression in U87-MG (**b**), U-251 MG (**d**) and HA primary astrocytes (**f**). PLC $\beta$ 1-silenced cells (shPLC $\beta$ 1) were compared to wild type (WT) and mock-transduced (shCTRL) samples. GAPDH was used as housekeeping gene and all the analysis derived from three independent experiments.
